# Supplementary material
Source: publisher figshare collection journal article supplement (https://gsajournals.figshare.com/ndownloader/files/20274864)
Supplement: Supplementary file 1 [file 20274864]

Table S1. *C. elegans* lines used in this study

| **Line** | **Genotype** |
| --- | --- |
| CV369 | *col-121(nx3) IV; yls34[Pxol-1::GFP, rol-6] V* |
| CV639 | *H2B::mCherry;*ɣ*-tubulin::GFP; col-121(nx3) IV* |
| CV798 | *dvIs19 [(pAF15)gst-4p::GFP::NLS] III; col-121(nx3) IV* |
| CV652 | *rad-54(ok615)/hT2 I; col-121(nx3) IV* |
| CV784 | *glp-1(bn18) III; col-121(nx3) IV* |
| LD1757 | *sek-1(km4) X* |
|  |  |
